# Supplementary material
Source: MDPI journal article supplement (https://www.mdpi.com/search?q=processes-07-00789)
Supplement: s001 [file processes-07-00789-s001.pdf]

# Supplementary Materials: The Synthesis of N-(Pyridin-2-yl)-Benzamides from Aminopyridine and Trans-Beta-Nitrostyrene by Fe<sub>2</sub>Ni-BDC Bimetallic Metal–Organic Frameworks

Trinh Duy Nguyen, Oanh Kim Thi Nguyen, Thuan Van Tran, Vinh Huu Nguyen, Long Giang Bach, Nhan Viet Tran, Dai-Viet N. Vo, Tuyen Van Nguyen, Seong-Soo Hong and Sy Trung Do

## General experimental information

All reactions were performed under air atmosphere. All chemicals were obtained from commercial sources and used directly without further treatment. Solvents used in the experiment have been prior treated following standard procedure. The reaction process was monitored by TLC. The NMR spectra were recorded in 400 MHz apparatus using CDCl<sub>3</sub> as solvent, and the frequencies <sup>1</sup>H, <sup>13</sup>C NMR measurement were 400 MHz and 100 MHz, respectively. Chemical shifts were recorded in ppm by employing TMS or the solvent peak of CDCl<sub>3</sub> (for <sup>13</sup>C NMR) as internal standard. GCMS analyses were performed using a Hewlett Packard GC-MS 5972 with a RTX-5MS column (length = 30 m, inner diameter = 0.25 mm, and film thickness = 0.5 μm). The temperature program for GC-MS analysis heated samples from 60 to 280 °C at 10 °C/min and held them at 280 °C for 2 min. Inlet temperature was set constant at 280 °C. MS spectra were compared with the spectra gathered in the NIST library.

## General procedure for the synthesis of N-pyridyl benzamide

To a 10 mL round-bottom flask equipped with stirring bar and air condenser was charged with *trans*-1-nitro-phenylethylene 1a (0.2 mmol), 2-pyridylamine 2a (0.2 mmol), DCM (1 mL) and Ni/Fe-MOF (0.02 mmol). The resulting mixture was stirred at 80 °C for 24 h. Upon completion, the reaction mixture was allowed to cool down to room temperature, and H<sub>2</sub>O (4 mL) was added to the vessel. The resulting suspension was extracted with ethyl acetate (3 × 8 mL). The organic phases were combined and dried over Na<sub>2</sub>SO<sub>4</sub>. After filtration, the solvent was removed from the solution under reduced pressure. The acquired residue was subjected to silica gel column chromatography to provide pure product by using mixed petroleum ether/ethyl acetate 1:3 (v/v) as the eluent.

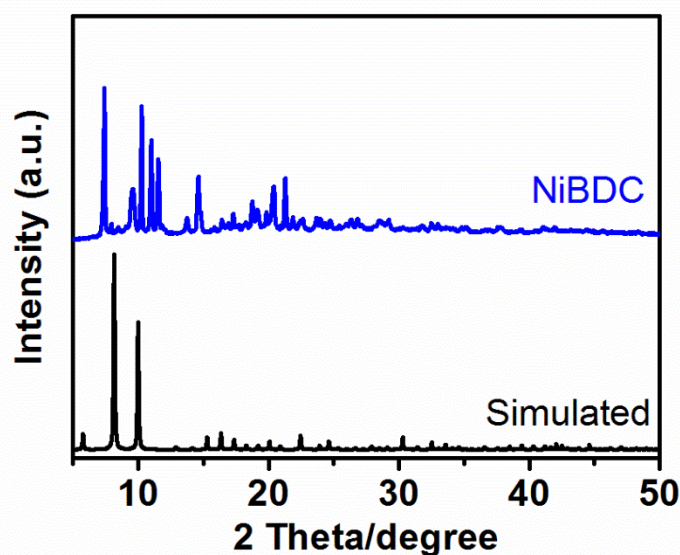

**Figure S1.** The presented simulated diffraction patterns for Ni-based was based on the corresponding check CIF file of Ni-BDC compare with experimental patterns.

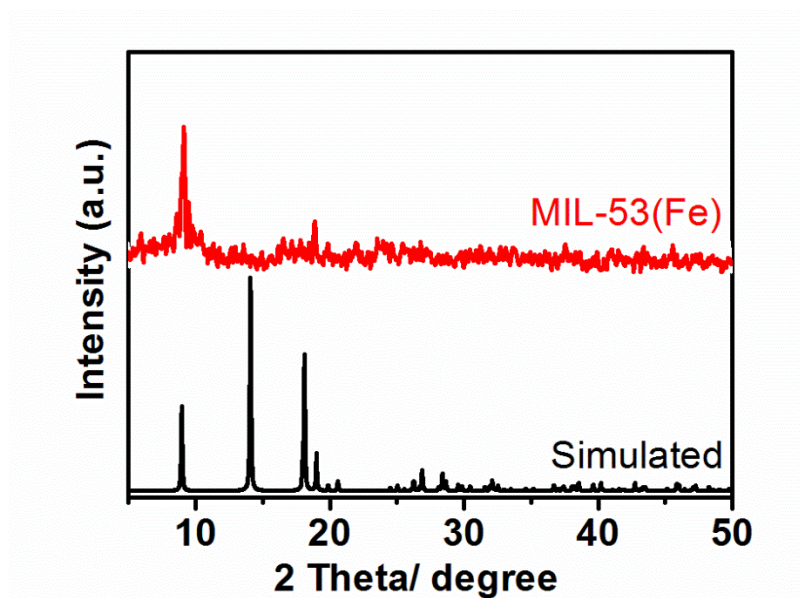

**Figure S2.** The presented simulated diffraction patterns for Fe-based was based on the corresponding check CIF file of MIL-53(Fe) compare with experimental patterns.

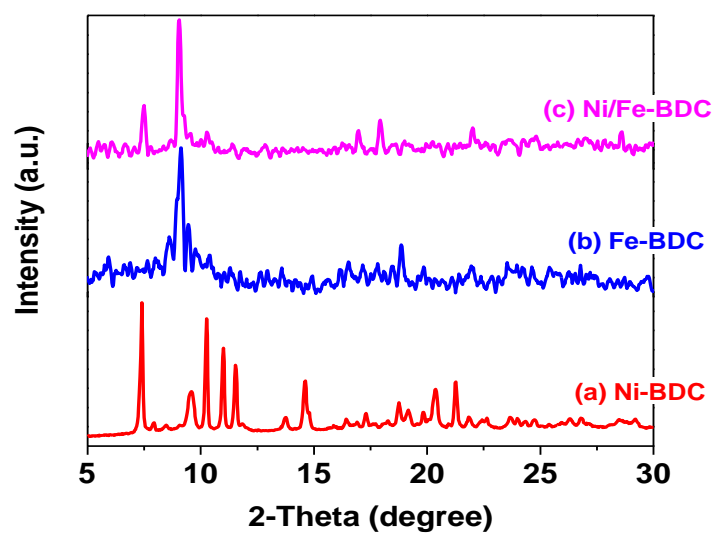

**Figure S3.** X-ray powder diffraction of Ni-BDC, Fe-BDC and Fe<sub>2</sub>Ni-BDC.

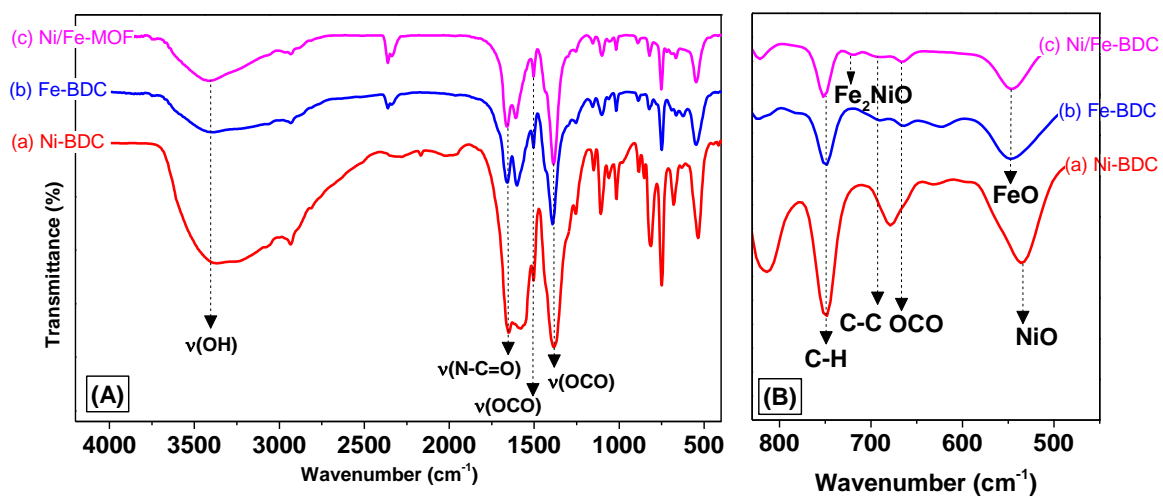

Figure S4. FT-IR spectra of the Ni-BDC, Fe-BDC, and  $\text{Fe}_2\text{Ni-BDC}$ .

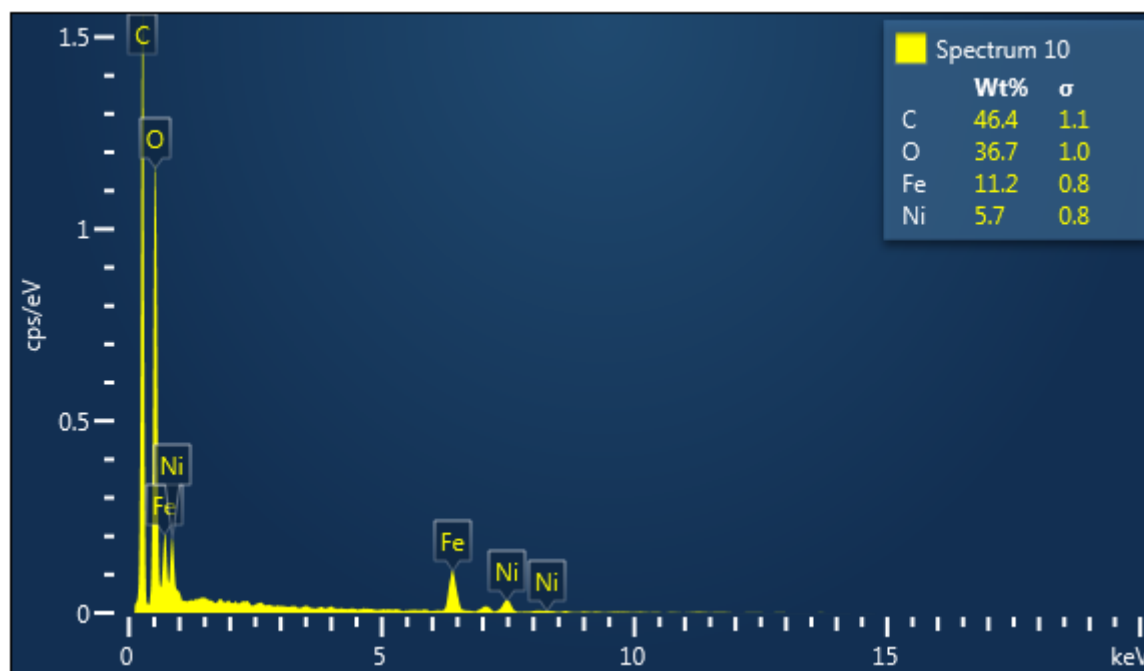

Figure S5. EDX mapping point of  $\text{NiFe}_2\text{-BDC}$ .

## General procedure of investigation for the synthesis of N-pyridinyl benzamide

Table S1. Optimization of reaction conditions.

| <div style="display: flex; align-items: center; justify-content: center;"> <div style="text-align: center; margin-right: 20px;"> 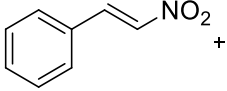 <p>1a</p> </div> <div style="text-align: center; margin-right: 20px;"> 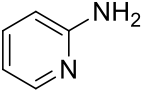 <p>2a</p> </div> <div style="text-align: center; margin-right: 20px;"> <p>catalyst (10mol%)<br/>solvent, 24h</p> </div> <div style="text-align: center;"> 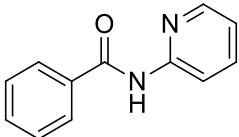 <p>3a</p> </div> </div> |                                                      |           |                              |                          |       |           |
|---------------------------------------------------------------------------------------------------------------------------------------------------------------------------------------------------------------------------------------------------------------------------------------------------------------------------------------------------------------------------------------------------------------------------------------------------------------------------------------------------------------------------------------------------------------------------------------------------------------------------------------------------|------------------------------------------------------|-----------|------------------------------|--------------------------|-------|-----------|
| Entry                                                                                                                                                                                                                                                                                                                                                                                                                                                                                                                                                                                                                                             | Cat.                                                 | mol% Cat. | Mole Proportion of Reactants | Sol.                     | Temp. | Yield (%) |
| 1                                                                                                                                                                                                                                                                                                                                                                                                                                                                                                                                                                                                                                                 | Ni/Fe-MOF                                            | 10        | 1:1                          | DCM                      | 80    | 82        |
| 2                                                                                                                                                                                                                                                                                                                                                                                                                                                                                                                                                                                                                                                 | NiBDC                                                | 10        | 1:1                          | DCM                      | 80    | 65        |
| 3                                                                                                                                                                                                                                                                                                                                                                                                                                                                                                                                                                                                                                                 | MIL-53(Fe)                                           | 10        | 1:1                          | DCM                      | 80    | 70        |
| 4                                                                                                                                                                                                                                                                                                                                                                                                                                                                                                                                                                                                                                                 | Ni(NO <sub>3</sub> ) <sub>2</sub> ·6H <sub>2</sub> O | 10        | 1:1                          | DCM                      | 80    | 50        |
| 5                                                                                                                                                                                                                                                                                                                                                                                                                                                                                                                                                                                                                                                 | FeCl <sub>3</sub> ·6H <sub>2</sub> O                 | 10        | 1:1                          | DCM                      | 80    | 73        |
| 6                                                                                                                                                                                                                                                                                                                                                                                                                                                                                                                                                                                                                                                 | Ni/Fe-MOF                                            | 10        | 1:1                          | DCM                      | rt    | 5         |
| 7                                                                                                                                                                                                                                                                                                                                                                                                                                                                                                                                                                                                                                                 | Ni/Fe-MOF                                            | 10        | 1:1                          | DCM                      | 60    | 57        |
| 8                                                                                                                                                                                                                                                                                                                                                                                                                                                                                                                                                                                                                                                 | Ni/Fe-MOF                                            | 10        | 1:1                          | DCM                      | 100   | 80        |
| 9                                                                                                                                                                                                                                                                                                                                                                                                                                                                                                                                                                                                                                                 | Ni/Fe-MOF                                            | 5         | 1:1                          | DCM                      | 80    | 47        |
| 10                                                                                                                                                                                                                                                                                                                                                                                                                                                                                                                                                                                                                                                | Ni/Fe-MOF                                            | 7.5       | 1:1                          | DCM                      | 80    | 60        |
| 11                                                                                                                                                                                                                                                                                                                                                                                                                                                                                                                                                                                                                                                | Ni/Fe-MOF                                            | 12.5      | 1:1                          | DCM                      | 80    | 79        |
| 12                                                                                                                                                                                                                                                                                                                                                                                                                                                                                                                                                                                                                                                | Ni/Fe-MOF                                            | 15        | 1:1                          | DCM                      | 80    | 80        |
| 13                                                                                                                                                                                                                                                                                                                                                                                                                                                                                                                                                                                                                                                | Ni/Fe-MOF                                            | 10        | 3:1                          | DCM                      | 80    | 35        |
| 14                                                                                                                                                                                                                                                                                                                                                                                                                                                                                                                                                                                                                                                | Ni/Fe-MOF                                            | 10        | 2:1                          | DCM                      | 80    | 56        |
| 15                                                                                                                                                                                                                                                                                                                                                                                                                                                                                                                                                                                                                                                | Ni/Fe-MOF                                            | 10        | 1:2                          | DCM                      | 80    | 78        |
| 16                                                                                                                                                                                                                                                                                                                                                                                                                                                                                                                                                                                                                                                | Ni/Fe-MOF                                            | 10        | 1:3                          | DCM                      | 80    | 75        |
| 17                                                                                                                                                                                                                                                                                                                                                                                                                                                                                                                                                                                                                                                | Ni/Fe-MOF                                            | 10        | 1:1                          | toluene                  | 80    | 30        |
| 18                                                                                                                                                                                                                                                                                                                                                                                                                                                                                                                                                                                                                                                | Ni/Fe-MOF                                            | 10        | 1:1                          | tetrahydrofurane         | 80    | 37        |
| 19                                                                                                                                                                                                                                                                                                                                                                                                                                                                                                                                                                                                                                                | Ni/Fe-MOF                                            | 10        | 1:1                          | clorobenzene             | 80    | 57        |
| 20                                                                                                                                                                                                                                                                                                                                                                                                                                                                                                                                                                                                                                                | Ni/Fe-MOF                                            | 10        | 1:1                          | dioxane                  | 80    | 50        |
| 21                                                                                                                                                                                                                                                                                                                                                                                                                                                                                                                                                                                                                                                | Ni/Fe-MOF                                            | 10        | 1:1                          | H <sub>2</sub> O         | 80    | 52        |
| 22                                                                                                                                                                                                                                                                                                                                                                                                                                                                                                                                                                                                                                                | Ni/Fe-MOF                                            | 10        | 1:1                          | DCM/H <sub>2</sub> O     | 80    | 75        |
| 23                                                                                                                                                                                                                                                                                                                                                                                                                                                                                                                                                                                                                                                | Ni/Fe-MOF                                            | 10        | 1:1                          | dioxane/H <sub>2</sub> O | 80    | 46        |
| 24                                                                                                                                                                                                                                                                                                                                                                                                                                                                                                                                                                                                                                                | Ni/Fe-MOF                                            | 10        | 1:1                          | DMF                      | 80    | 5         |
| 25                                                                                                                                                                                                                                                                                                                                                                                                                                                                                                                                                                                                                                                | Ni/Fe-MOF                                            | 10        | 1:1                          | dicloroethane            | 80    | 72        |
| 26 <sup>b</sup>                                                                                                                                                                                                                                                                                                                                                                                                                                                                                                                                                                                                                                   | Ni/Fe-MOF                                            | 10        | 1:1                          | DCM                      | 80    | trace     |
| 27 <sup>c</sup>                                                                                                                                                                                                                                                                                                                                                                                                                                                                                                                                                                                                                                   | Ni/Fe-MOF                                            | 10        | 1:1                          | DCM                      | 80    | 20        |
| 28 <sup>d</sup>                                                                                                                                                                                                                                                                                                                                                                                                                                                                                                                                                                                                                                   | Ni/Fe-MOF                                            | 10        | 1:1                          | DCM                      | 80    | 55        |
| 29                                                                                                                                                                                                                                                                                                                                                                                                                                                                                                                                                                                                                                                | -                                                    | 10        | 1:1                          | DCM                      | 80    | trace     |

<sup>a</sup>Reaction conditions: **1a** (0.2 mmol), **2a** (0.2 mmol), catalyst (0.02 mmol), in 1 mL solvent, stirred for 24 h under air. <sup>b</sup>Reaction under N<sub>2</sub>. <sup>c</sup>Reaction under O<sub>2</sub>. <sup>d</sup>In the presence of TEMPO (2 eq.).

## Characterization data for all products

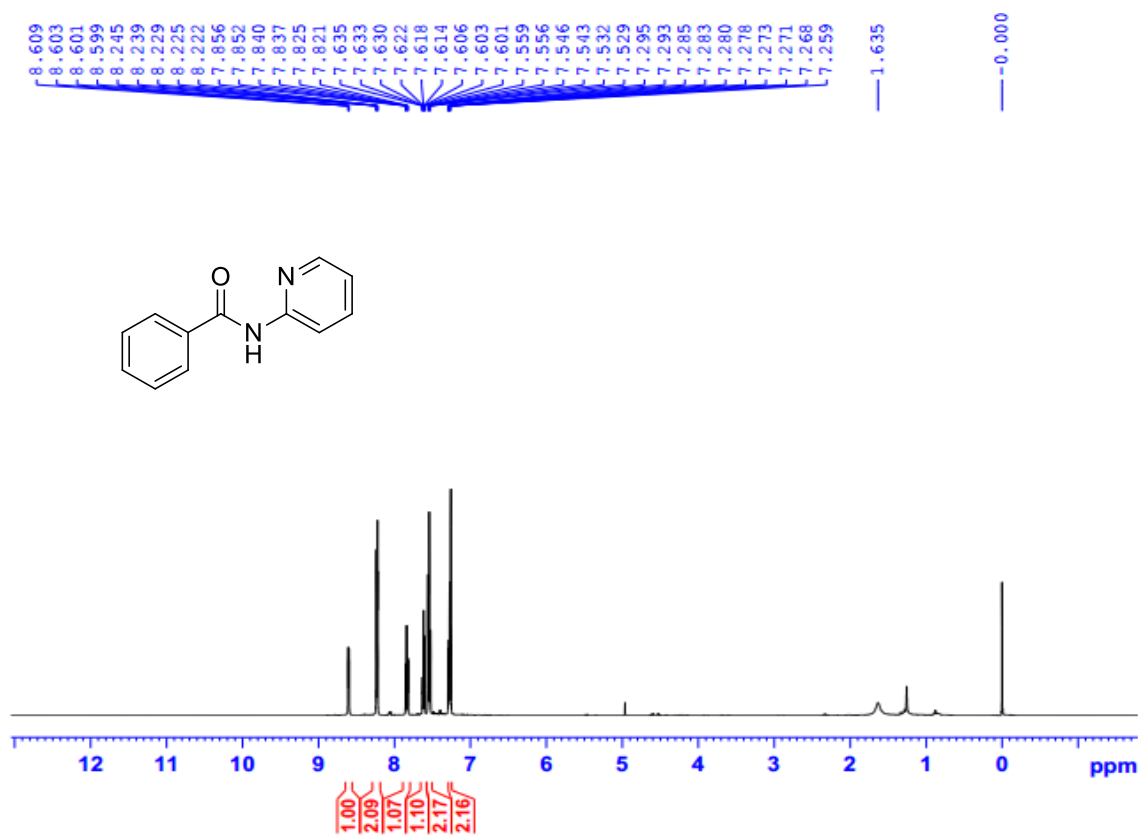

Figure S6. <sup>1</sup>H-NMR spectra of N-(pyridin-2-yl)benzamide.

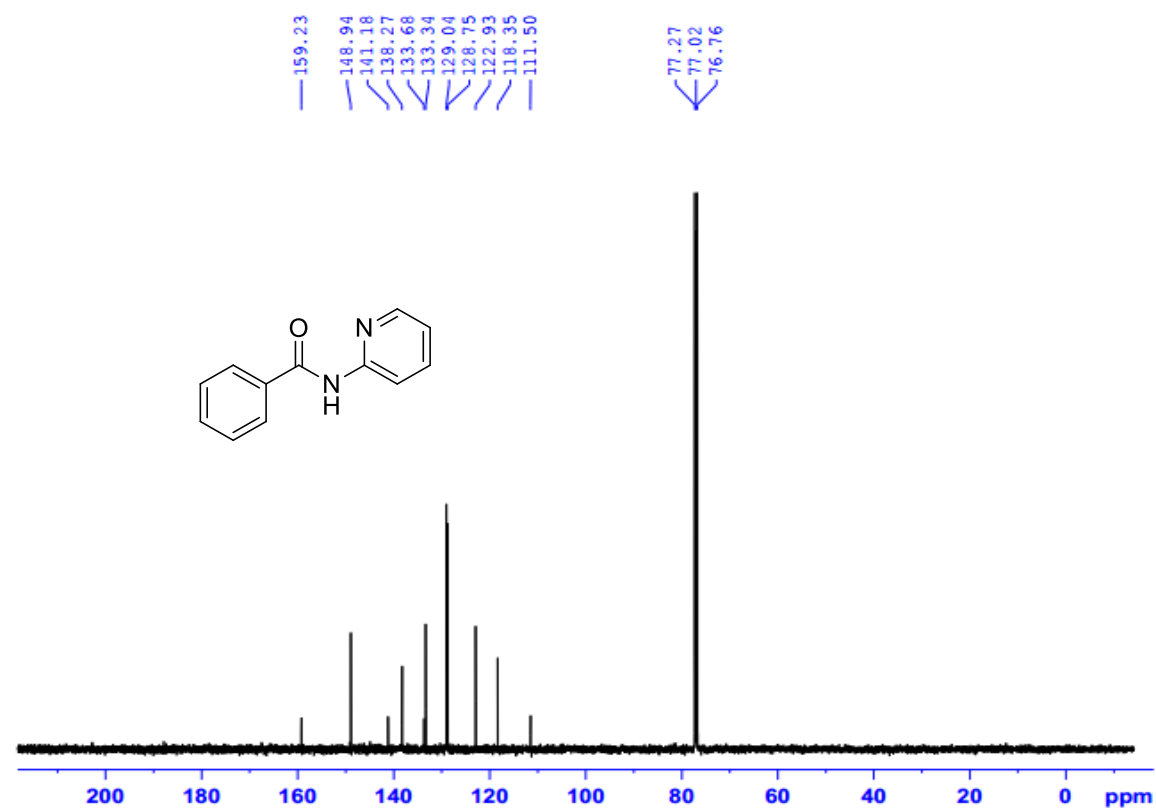

Figure S7. <sup>13</sup>C-NMR spectra of N-(pyridin-2-yl)benzamide.

Characterization data for N-(pyridin-2-yl)benzamide

Prepared as shown in the general experimental procedure and purified on silica gel (ethyl acetate/hexane = 1:3): yellow solid, 82% yield.  $^1\text{H}$ -NMR (500 MHz,  $\text{CDCl}_3$ )  $\delta$  8.60 (d,  $J$  = 6.5 Hz, 1H), 8.23 (d,  $J$  = 8 Hz, 2H), 7.84 (ddd,  $J$  = 8 Hz, 1H), 7.63 – 7.53 (m, 3H), 7.29 – 7.26 (m, 2H);  $^{13}\text{C}$ -NMR (125 MHz,  $\text{CDCl}_3$ )  $\delta$  159.23, 148.94, 141.18, 138.27, 133.68, 133.34, 129.04, 128.75, 122.93, 118.35, 111.50. GC-MS, Mass: 197.

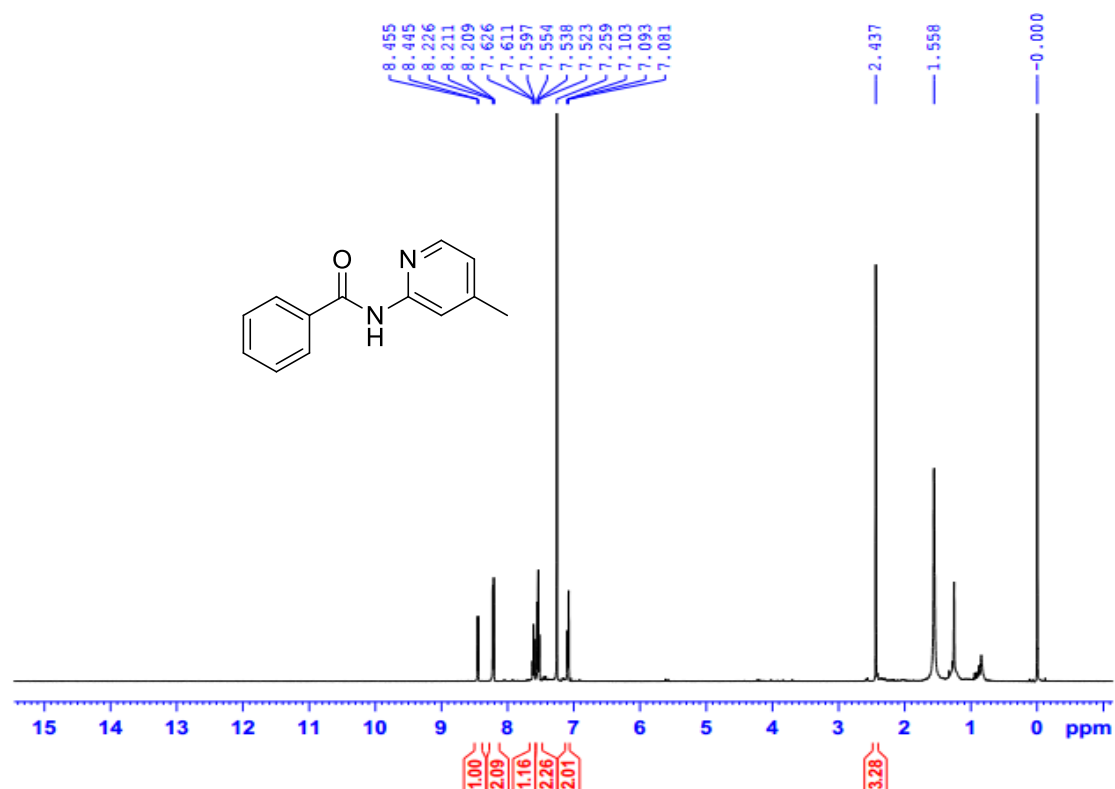

Figure S8.  $^1\text{H}$ -NMR spectra of N-(4-methylpyridin-2-yl)benzamide.

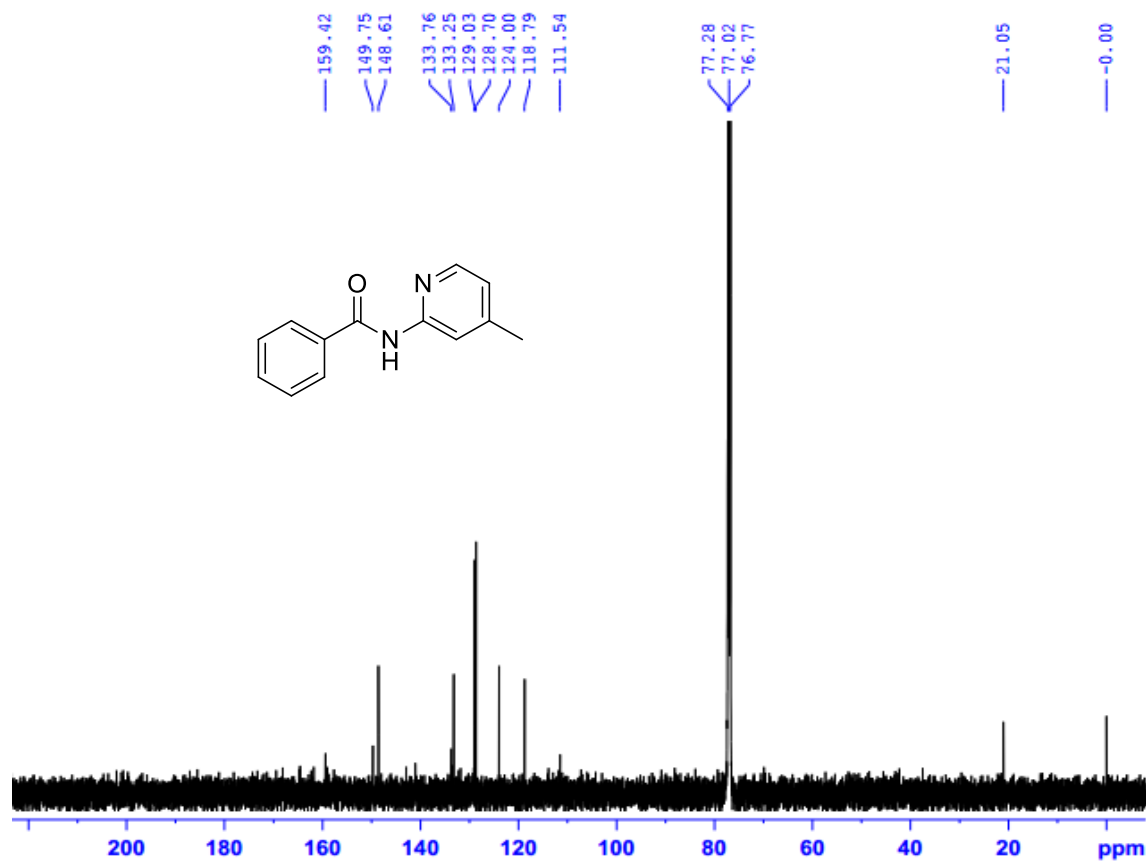

Figure S9. <sup>13</sup>C-NMR spectra of N-(4-methylpyridin-2-yl)benzamide.

#### Characterization data for N-(4-methylpyridin-2-yl)benzamide

Prepared as shown in the general experimental procedure and purified on silica gel (ethyl acetate/hexane = 1:3): yellow solid, 70% yield. <sup>1</sup>H-NMR (500 MHz, CDCl<sub>3</sub>) δ 8.45 (d, *J* = 5.0 Hz, 1H), 8.22 (d, *J* = 7.5 Hz, 2H), 7.61 (t, *J* = 7.5 Hz, 1H), 7.54 (t, *J* = 8 Hz, 2H), 7.09 (t, *J* = 6.0 Hz, 2H), 2.44 (s, 3H); <sup>13</sup>C-NMR (125 MHz, CDCl<sub>3</sub>) δ 159.42, 149.75, 148.61, 133.76, 133.25, 129.03, 128.70, 124.00, 118.79, 111.54, 21.05.

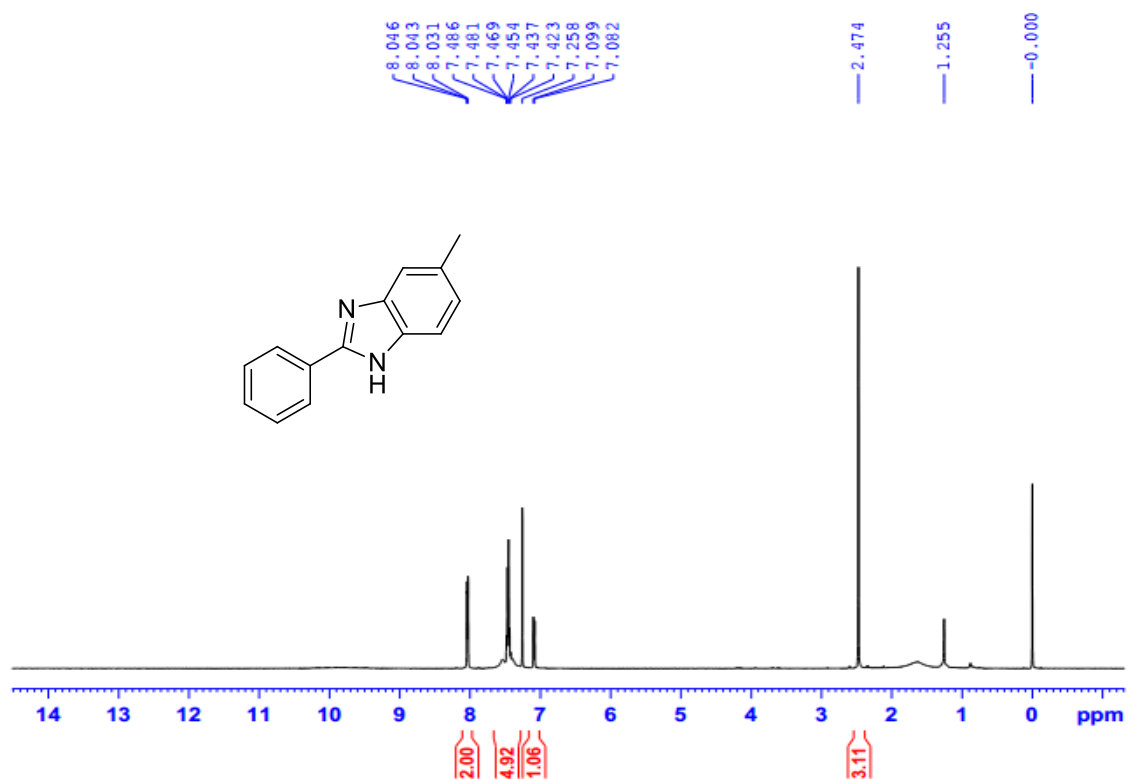

Figure S10. <sup>1</sup>H-NMR spectra of 5-methyl-2-phenyl- 1H-benzo[d]imidazole.

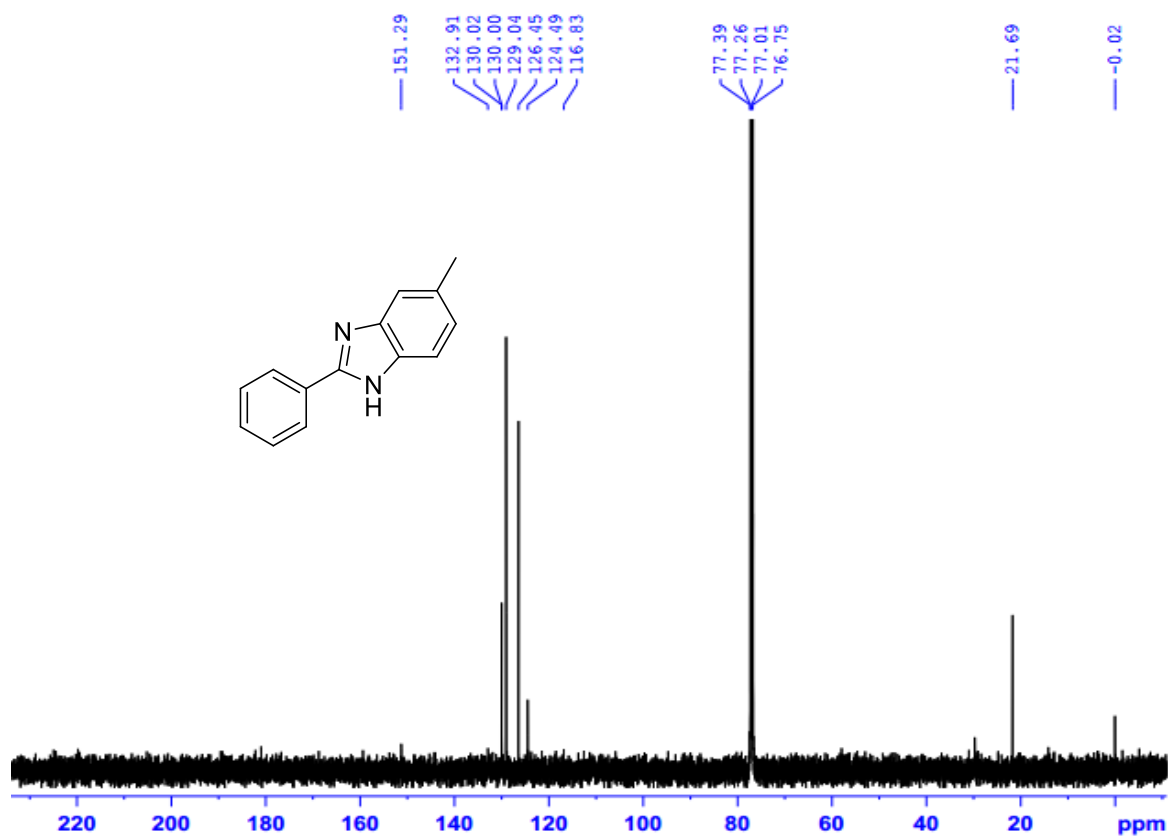

Figure S11. <sup>13</sup>C-NMR spectra of 5-methyl-2-phenyl- 1H-benzo[d]imidazole.

#### Characterization data for 5-methyl-2-phenyl- 1H-benzo [d] imidazole

Prepared as shown in the general experimental procedure and purified on silica gel (ethyl acetate/hexane = 1:4): yellow solid, 63% yield. <sup>1</sup>H-NMR (500 MHz, CDCl<sub>3</sub>) δ 8.04 (d, *J* = 7.5 Hz, 2H),

7.48 – 7.42 (m, 5H), 7.09 (d,  $J = 8.5$  Hz, 1H), 2.47 (s, 3H);  $^{13}\text{C}$ -NMR (125 MHz,  $\text{CDCl}_3$ )  $\delta$  151.29, 132.91, 130.02, 130.00, 129.04, 126.45, 124.49, 116.83, 21.69.

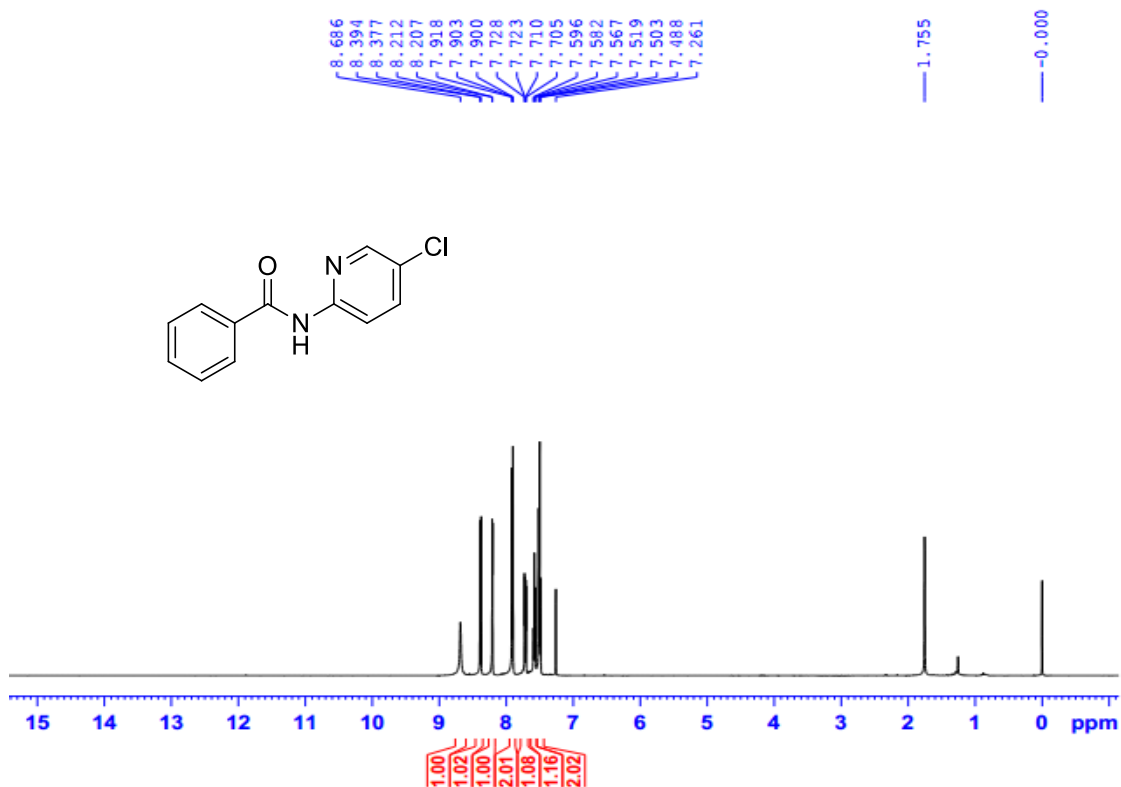

Figure S12.  $^1\text{H}$ -NMR spectra of N-(5-chloropyridin-2-yl)benzamide.

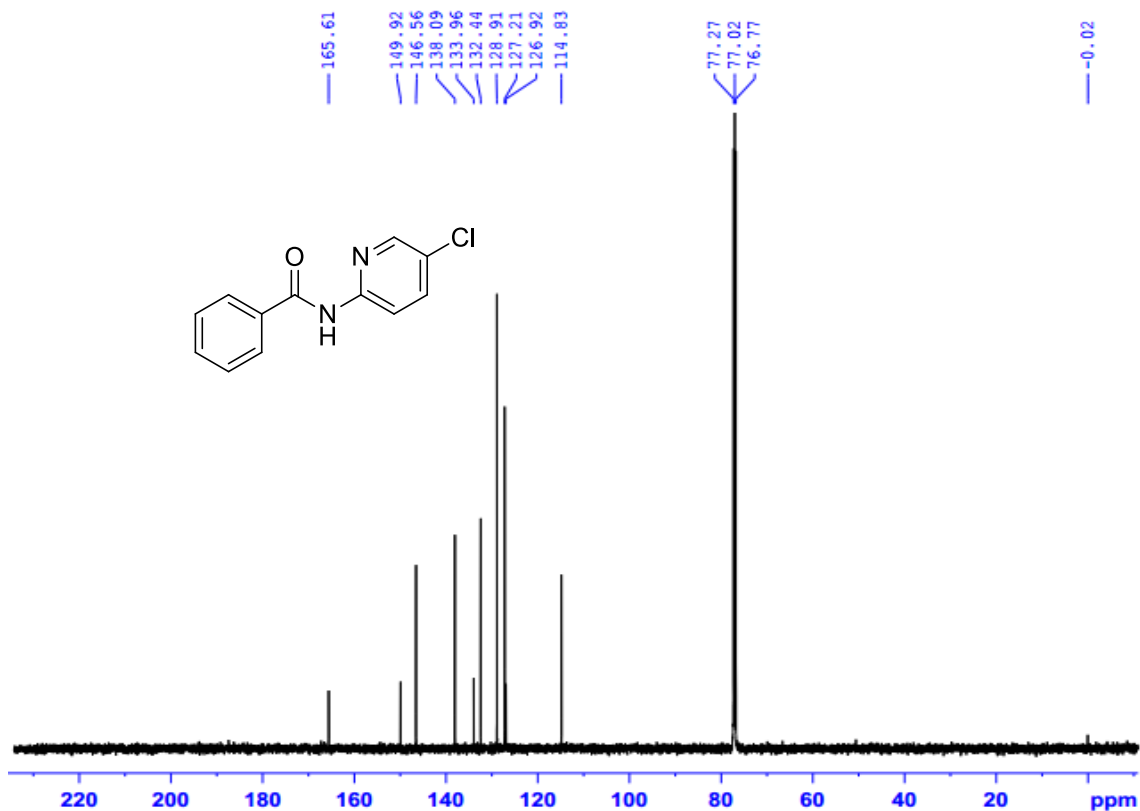

Figure S13.  $^{13}\text{C}$ -NMR spectra of N-(5-chloropyridin-2-yl)benzamide.

Characterization data for N-(5-chloropyridin-2-yl)benzamide

Prepared as shown in the general experimental procedure and purified on silica gel (ethyl acetate/hexane = 1:3): yellow solid, 68% yield.  $^1\text{H-NMR}$  (500 MHz,  $\text{CDCl}_3$ )  $\delta$  8.68 (s, 1H), 8.38 (d,  $J$  = 8.5 Hz, 1H), 8.21 (s, 1H), 7.91 (d,  $J$  = 7.5 Hz, 2H), 7.72 (dd,  $J$  = 9 Hz, 1H), 7.58 (t,  $J$  = 7.5 Hz, 1H), 7.50 (t,  $J$  = 8 Hz, 2H);  $^{13}\text{C-NMR}$  (125 MHz,  $\text{CDCl}_3$ )  $\delta$  165.61, 149.92, 146.56, 138.09, 133.96, 132.44, 128.91, 127.21, 126.92, 114.83.

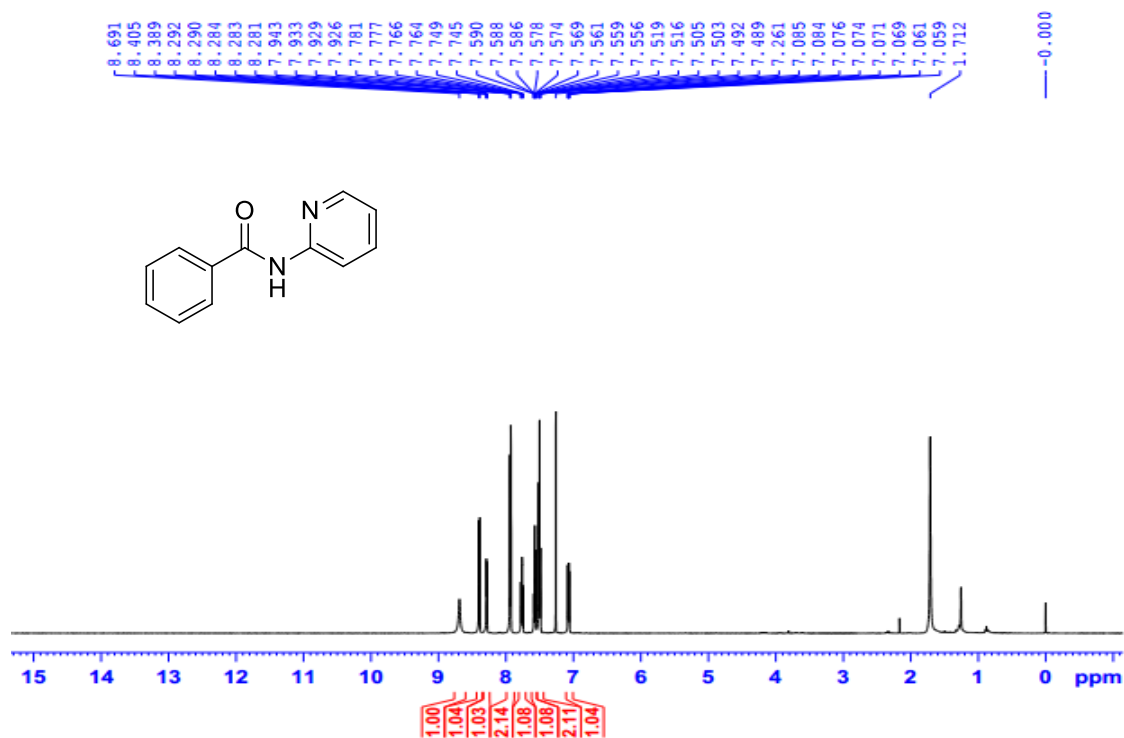

Figure S14.  $^1\text{H-NMR}$  spectra of N-(pyridin-2-yl)benzamide.

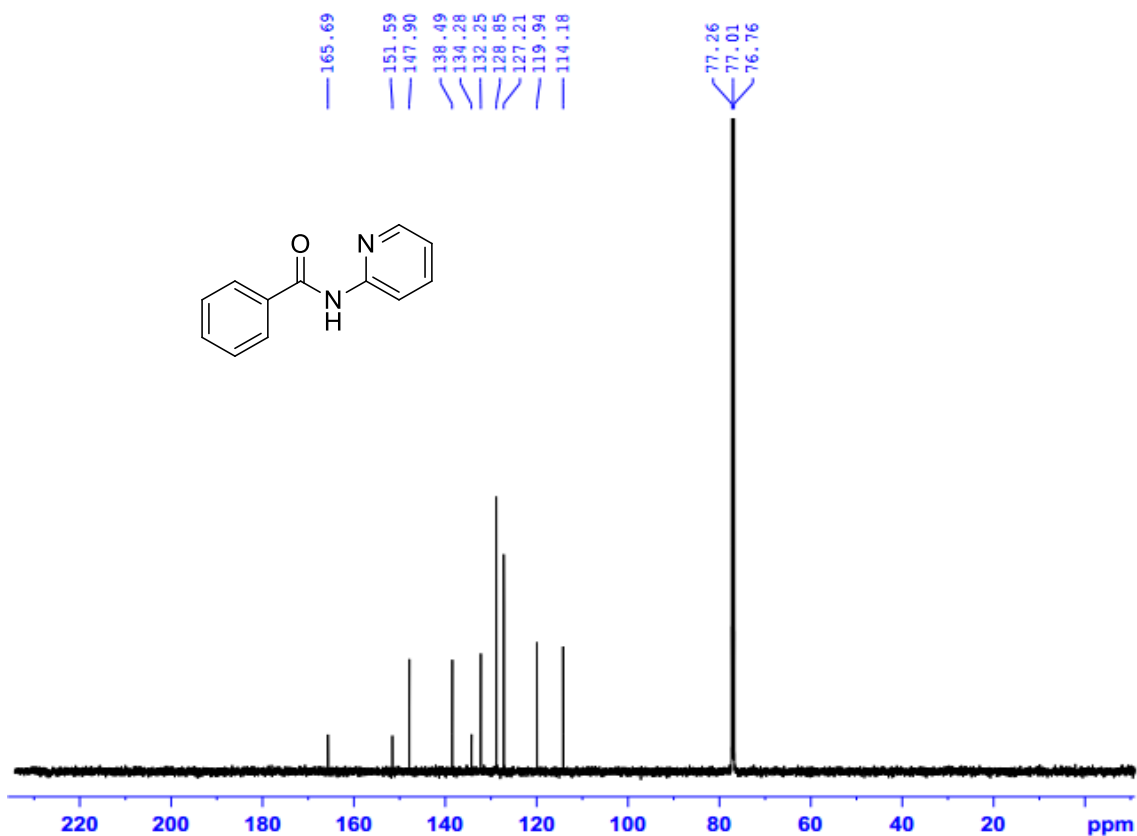

**Figure S15.**  $^{13}\text{C}$ -NMR spectra of N-(pyridin-2-yl)benzamide.

**Characterization data for N-(pyridin-2-yl)benzamide**

Prepared as shown in the general experimental procedure and purified on silica gel (ethyl acetate/hexane = 1:3): yellow solid, 74% yield.  $^1\text{H}$ -NMR (500 MHz,  $\text{CDCl}_3$ )  $\delta$  8.69 (s, 1H), 8.39 (d,  $J$  = 8 Hz, 1H), 8.29 (d,  $J$  = 5.5 Hz, 1H), 7.93 (d,  $J$  = 7 Hz, 1H), 7.78 – 7.74 (m, 1H), 7.59 – 7.55 (m, 1H), 7.52 – 7.49 (m, 2H), 7.09 – 7.06 (m, 1H);  $^{13}\text{C}$ -NMR (125 MHz,  $\text{CDCl}_3$ )  $\delta$  165.69, 151.59, 147.90, 138.49, 134.28, 132.25, 128.85, 127.21, 119.94, 114.18.
